# Supplementary material for: Norepinephrine induces anoikis resistance in high-grade serous ovarian cancer precursor cells
Source: PubMed Central journal article supplement (PMC10972597; doi:10.1172/jci.insight.170961), 2024-01-25

Full unedited blots for Supplemental Figure 4:

**ADRB2**  
Sigma #HPA003431  
(1:1000)

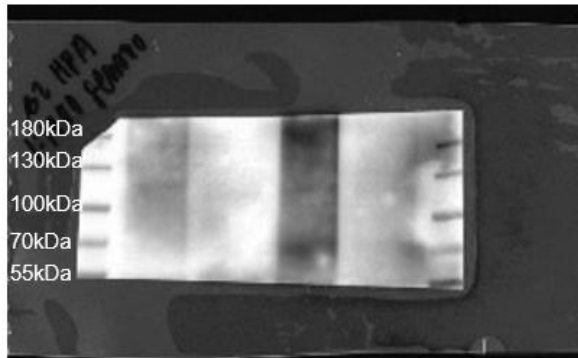

**GAPDH**  
CST #97166S  
(1:1000)

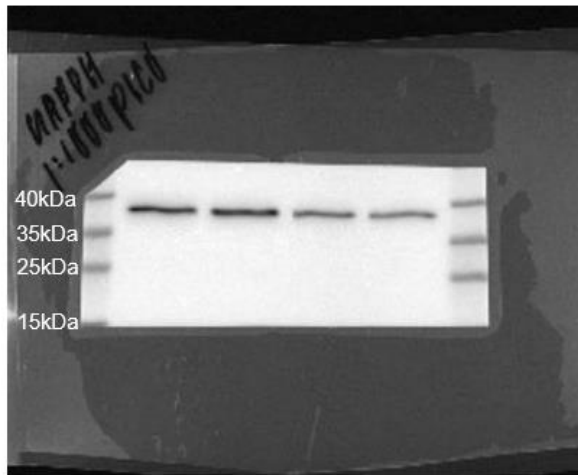

Supplement: jciinsight-9-170961-s044.pdf [file jciinsight-9-170961-s044.pdf]
